# Supplementary material for: Cytoplasmic, full length and novel cleaved variant, TBLR1 reduces apoptosis in prostate cancer under androgen deprivation
Source: PubMed Central journal article supplement (PMC5129953; doi:10.18632/oncotarget.9005), 2016-04-26
Supplement: oncotarget-07-39556-s001.pdf [file oncotarget-07-39556-s001.pdf]

## Cytoplasmic, full length and novel cleaved variant, TBLR1 reduces apoptosis in prostate cancer under androgen deprivation

### Supplementary Materials

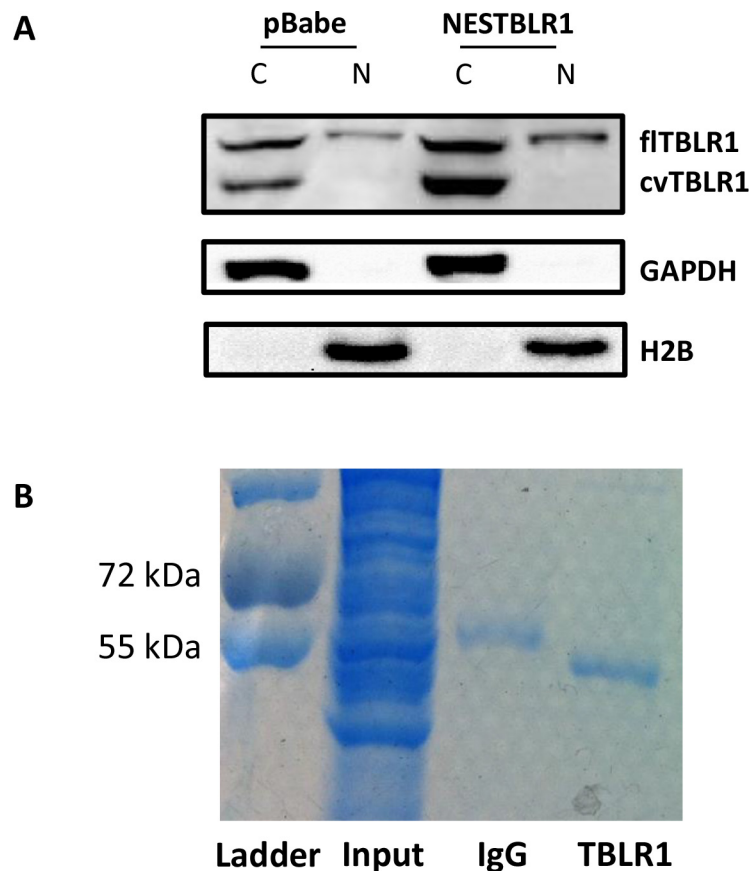

**Supplementary Figure S1: Colloidal coomassie blue stain of cvTBLR1 purification.** (A) Western blot for TBLR1 on fractionated cell lysates comparing LNCaP NESTBLR1 to LNCaP pBabe control. (B) Total cell lysate input and 10% loading of cvTBLR1 and IgG control immunoprecipitation for large scale purification of protein used for mass spectrometric analysis.

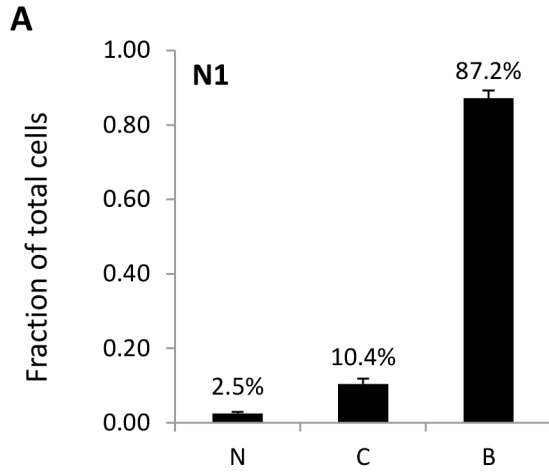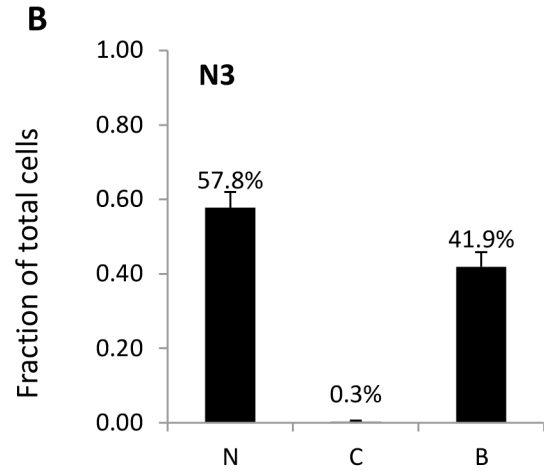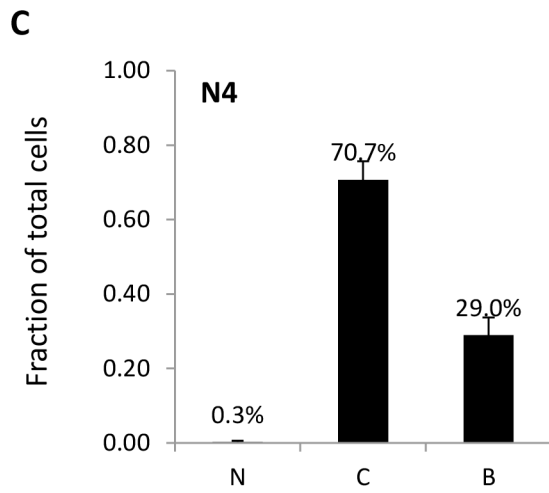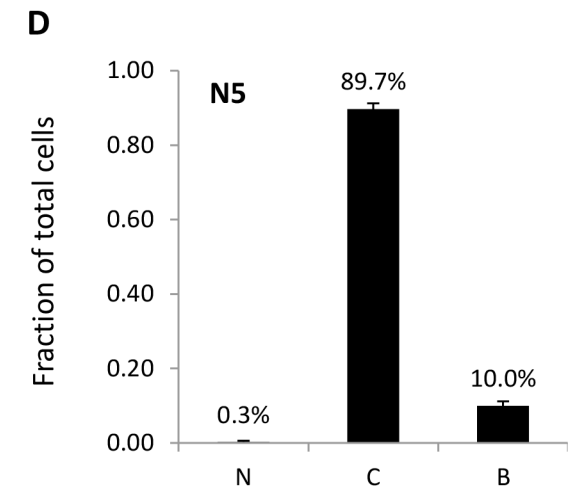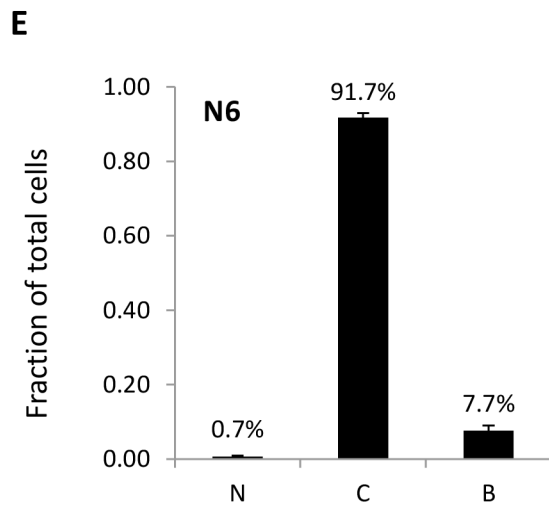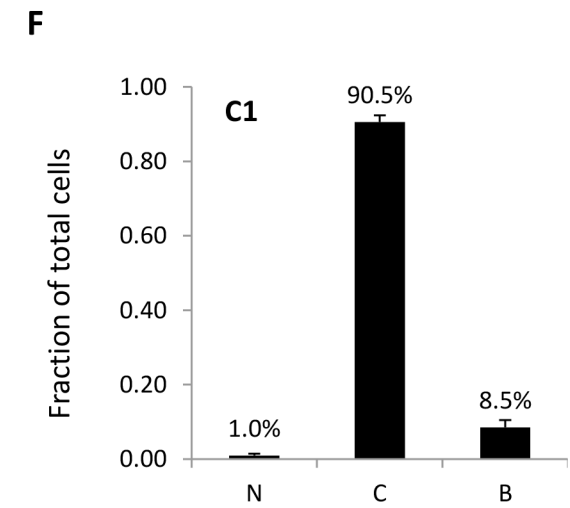

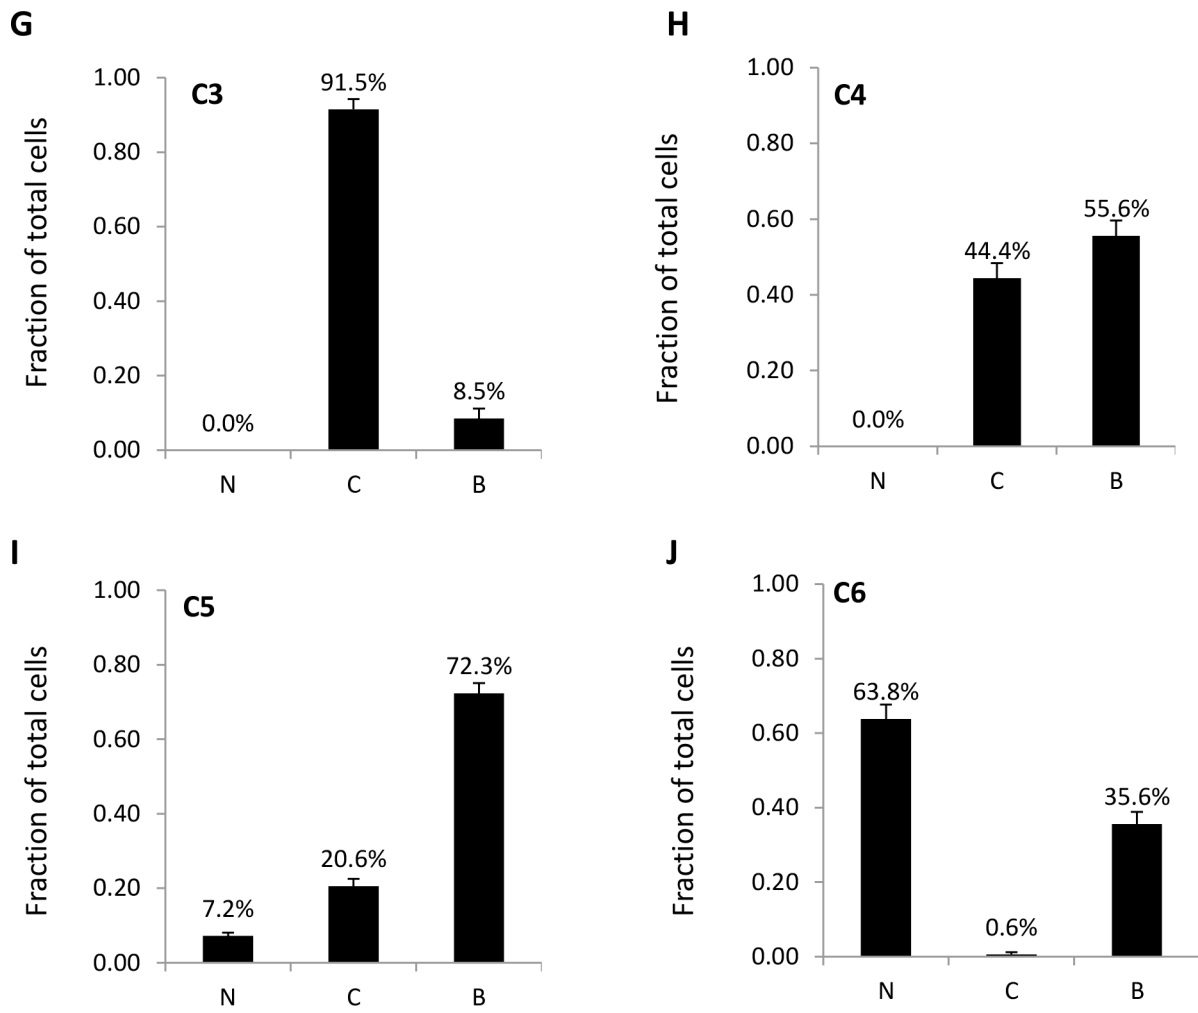

**Supplementary Figure S2: Deletion analysis of TBLR1 to identify localization sequences.** (A–J) Quantification of TBLR1 localization observed in 293T cells transfected with mutant GFP-TBLR1 constructs. Cells showing GFP expression by fluorescent imaging were counted as cytoplasmic, nuclear, or both for expression.

**Supplementary Table S1: List of primers used for mutation analysis cloning**

|          |                                              |
|----------|----------------------------------------------|
| N1       | F: 5'-aaggCATATGatgagtataagcagtg-3'          |
|          | R: 5'-gtacGGATCCCTActgactgatatggcttc-3'      |
| N2       | F: 5'-aaggCATATGatgagtataagcagtg-3'          |
|          | R: 5'-gtacGGATCCCTAaggcatctatcaggacag-3'     |
| N3       | F: 5'-aaggCATATGatgagtataagcagtg-3'          |
|          | R: 5'-gtacGGATCCCTAagagccactGGTgctgtt-3'     |
| N4       | F: 5'-aaggCATATGatgagtataagcagtg-3'          |
|          | R: 5'-gtacGGATCCCTActgttcttggcttcacc-3'      |
| N5       | F: 5'-aaggCATATGatgagtataagcagtg-3'          |
|          | R: 5'-gtacGGATCCCTAatcatggacacaattgtc-3'     |
| N6       | F: 5'-aaggCATATGatgagtataagcagtg-3'          |
|          | R: 5'-gtacGGATCCCTAaggtatggatgcatatccc-3'    |
| C1       | F: 5'-gtacCATATGtccaataataatggtgcc-3'        |
|          | R: 5'-aagtGGATCCCTAttccgaaggtctaatac-3'      |
| C2       | F: 5'-gtacCATATGcctgatgtagtacaaca-3'         |
|          | R: 5'-aagtGGATCCCTAttccgaaggtctaatac-3'      |
| C3       | F: 5'-gtacCATATGacacagttagtacttaga-3'        |
|          | R: 5'-aagtGGATCCCTAttccgaaggtctaatac-3'      |
| C4       | F: 5'-gtacCATATGtttctttcattcagca-3'          |
|          | R: 5'-aagtGGATCCCTAttccgaaggtctaatac-3'      |
| C5       | F: 5'-gtacCATATGttgcaagcacataataaa-3'        |
|          | R: 5'-aagtGGATCCCTAttccgaaggtctaatac-3'      |
| C6       | F: 5'-gtacCATATGttgacaaaacaccaagag-3'        |
|          | R: 5'-aagtGGATCCCTAttccgaaggtctaatac-3'      |
| N7       | F: 5'-aaggCATATGatgagtataagcagtg-3'          |
|          | R: 5'-aagtGGATCCCTAagactctattggtcgaccatca-3' |
| C7       | F: 5'-aaggCATATGctgtccctgatagatgccgtaa-3'    |
|          | R: 5'-aagtGGATCCCTAttccgaaggtctaatac-3'      |
| C8       | F: 5'-ttacgaCATATGgatggtcgaccaatagag-3'      |
|          | R: 5'-aagtGGATCCCTAttccgaaggtctaatac-3'      |
| Leu81Ala | 5'-cggcatctatcaggacgcagactctattggtcgac-3'    |
|          | 5'-gtcgaccaatagatctgctgcctgatagatgccg-3'     |
| Leu83Ala | 5'-ggcattacggcatctatcgggacagagactctattgg-3'  |
|          | 5'-ccaatagagtctctgtccgcatagatgccgtaatgcc-3'  |

F: Forward; R: Reverse.

Forward and reverse primers used to create pCDNA GFP N1-N7, C1-C8, and site-directed mutation primers to modify leucine to alanine residues.
